# Supplementary material
Source: publisher figshare collection journal article supplement (https://acs.figshare.com/ndownloader/files/4477129)
Supplement: Supplementary file 1 [file 4477129]

# Microwave Makes Carbon Nanotubes less Defective

Wei Lin<sup>1,2</sup>, Kyoung-Sik Moon<sup>1</sup>, Shanju Zhang<sup>2</sup>, Yong Ding<sup>1</sup>, Jintang Shang<sup>3</sup>, Mingxiang Chen<sup>4</sup>, Ching-ping Wong<sup>1,\*</sup>

## Supporting Information

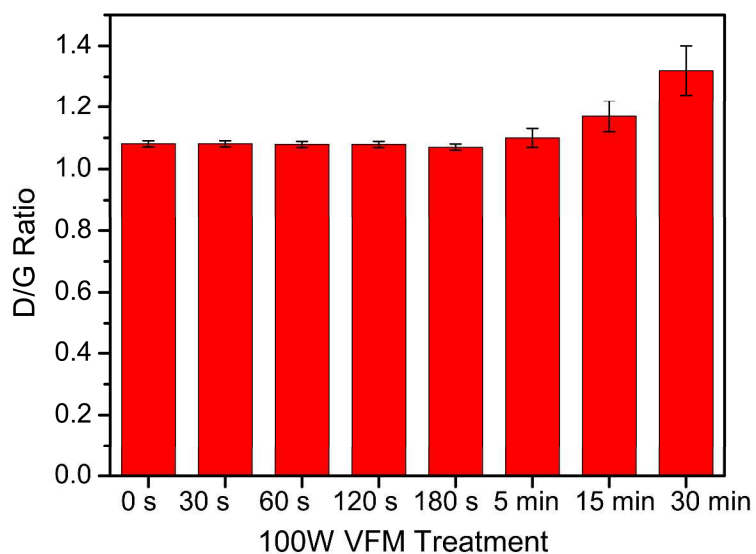

**Figure S1.**  $I_D/I_G$  of the VACNT samples treated by VFM with 100 W of power at varied duration.

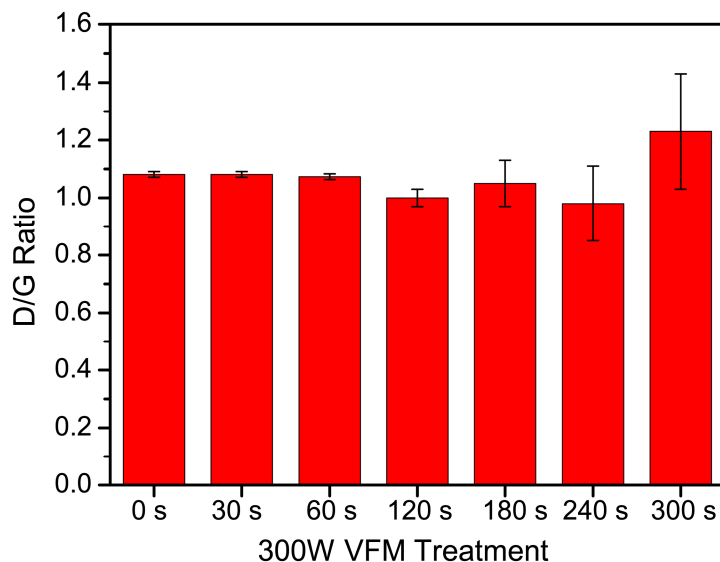

**Figure S2.**  $I_D/I_G$  of the VACNT samples treated by VFM with 300 W of power at varied duration.

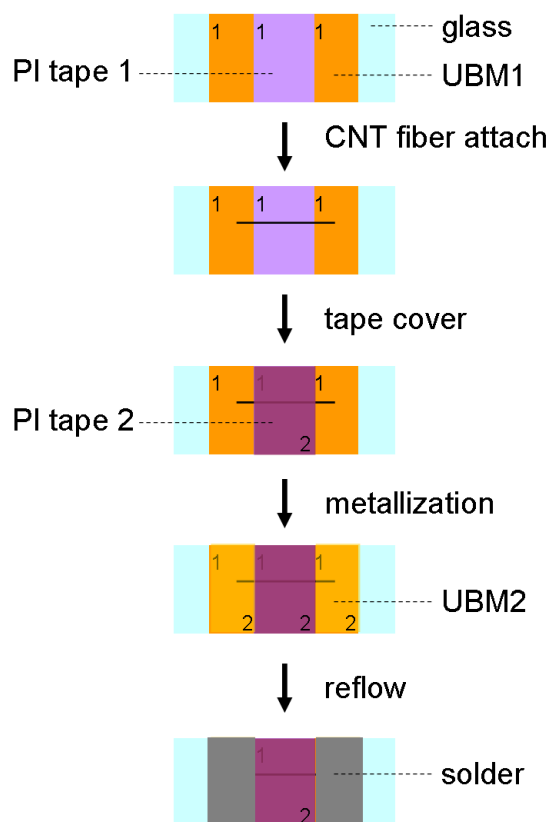

**Figure S3.** Illustration of the electrical conductivity measurement technique for an effective reduction of contact resistance. PI tape represents a double-sided polyimide tape; UBM represents under bump metallurgy layer, which is Au/Ni/Ti in this study.
